# Supplementary material for: sMAdCAM: IL-6 Ratio Influences Disease Progression and Anti-Viral Responses in SARS-CoV-2 Infection
Source: PubMed Central journal article supplement (PMC8236632; doi:10.3389/fimmu.2021.619906), 2021-06-14

## Index

1. Supplemental Table 1. Study cohort characteristics
2. Supplemental Figure 1: Distribution of plasma TNF- $\alpha$  across various serological groups of SARS-CoV-2 infected individuals.
3. Supplemental Figure 2: Association of IL-6 with other cytokines and Ct for RT-PCR of different SARS-CoV-2 gene.
4. Supplemental Figure 3: Association of TNF- $\alpha$  with other cytokines and Ct for RT-PCR of different SARS-CoV-2 gene.
5. Supplemental Figure 4: Analysis of circulating lipopolysaccharides (LPS) with SARS-CoV-2 disease progression

Supplemental Table 1. Study cohort characteristics

| Sample Id        | Age (Yrs) | Gender (M/F) | Ct Value |    |     | Days post PCR test until sampling | (IgM) | (IgG) | CLIA IgG (Value) | Co-morbidities                    | Medication                                                                                                    |
|------------------|-----------|--------------|----------|----|-----|-----------------------------------|-------|-------|------------------|-----------------------------------|---------------------------------------------------------------------------------------------------------------|
|                  |           |              | N        | O  | S/R |                                   |       |       |                  |                                   |                                                                                                               |
| U1               | 51        | M            | 32       | 32 | 33  | 3                                 | +     | +     | 3.16             | HIV+                              | Cefixime, Pan 40, Pcm, MVBC, Vit C (500mg), cough syrup                                                       |
| U2               | 55        | M            | 19       | 21 | 20  | 9                                 | -     | -     | 1.55             | None                              | PCM 500, Pan 40, Levocet 5MG                                                                                  |
| U3               | 34        | M            | 25       | 26 | 25  | 0                                 | -     | -     | -                | TRF not traceable                 | NA                                                                                                            |
| <sup>a</sup> U4  | 38        | F            | 31       | 29 | 28  | 11                                | -     | +     | 5.94             | Diabetes mellitus                 | DD, MUBC, Metformin 500mg, Insulin , Pantop 40mg                                                              |
| U5               | 38        | M            | 33       | 32 | 34  | 2                                 | +     | +     | 4.72             | Diabetes                          | Azithromycin,HCO, Tamiflu, Vit C, Augmentin,                                                                  |
| U6               | 72        | F            | 28       | 25 | 26  | 11                                | +     | +     | 5.28             | Diabetes, Hypertension            | Azec, Pan40, Glimi, MVBC, Amlodipin, Inj PJ                                                                   |
| U7               | 35        | F            | 33       | 32 | 33  | 3                                 | +     | +     | 6.9              | None                              | NA                                                                                                            |
| U8               | 40        | F            | -        | -  | -   | 17                                | +     | +     | 2.6              | None                              | Pan , MVBC                                                                                                    |
| <sup>a</sup> U9  | 70        | M            | 34       | 32 | 32  | 5                                 | -     | -     | 7.19             | None                              | Not available                                                                                                 |
| U10              | 63        | M            | 25       | 26 | 25  | 2                                 | -     | -     | 1.57             | Diabetes                          | HCO, Tamiflu, Vit C, Pan 40, MVBC,Paracetamol                                                                 |
| U11              | 69        | F            | 33       | 32 | 33  | 3                                 | -     | +     | 8.23             | Diabetes mellitus                 | Azec, MVBC, Pan 40                                                                                            |
| <sup>a</sup> U12 | 35        | F            | 37       | 33 | 32  | 11                                | -     | -     | 5.85             | Diabetes mellitus                 | DD, MUBC, Pantop 40, Tenegliptin, Metformin                                                                   |
| <sup>b</sup> U13 | 55        | M            | 26       | 24 | 25  | 6                                 | -     | +     | 6.47             | None                              | Augmentin, Para, Pan40, Vit C, MVBC                                                                           |
| <sup>c</sup> U14 | 50        | M            | 35       | 28 | 28  | 6                                 | -     | -     | 5.47             | Diabetes mellitus                 | NA                                                                                                            |
| <sup>a</sup> U15 | 55        | M            | 32       | 30 | 30  | 10                                | -     | -     | -                | Hypertension, Hyperlipidemia      | Azec, MVBC, Pan 40                                                                                            |
| <sup>a</sup> U16 | 65        | F            | 32       | 31 | 32  | 6                                 | -     | -     | 8.8              | None                              | MVBC, Pan 40                                                                                                  |
| U17              | 66        | M            | -        | 32 | -   | 19                                | -     | +     | 7.83             | Diabetes, Hypertension            | Telma 40 mg, aml0 5mg, rosuvastatin 5mg, levocet10mg, MVBC, Pan 40, PCM 500mg, Teneligliptin/metformin 20/500 |
| U18              | 45        | M            | 27       | 26 | 26  | 11                                | -     | +     | 7.08             | None                              | PCM, Pan 40, MVBC, Azec                                                                                       |
| <sup>a</sup> U19 | 54        | M            | 23       | 22 | 22  | 9                                 | -     | +     | 3.36             | Diabetes, Immune thrombocytopenia | Azec 500, mvbc, pan 40, pcm 500                                                                               |
| U20              | 45        | M            | 30       | 30 | 30  | 3                                 | -     | -     | -                | None                              | NA                                                                                                            |
| U21              | 40        | M            | 24       | 22 | 23  | 5                                 | -     | +     | 4.07             | None                              | Augmentin, Calpol 650, MVBC, Vit C, Pan 40                                                                    |
| <sup>a</sup> U22 | 37        | M            | 31       | 31 | 31  | 3                                 | -     | +     | 5.93             | None                              | Azec, Pan 40, MVBC                                                                                            |
| U23              | 40        | M            | 32       | 31 | 31  | 3                                 | -     | +     | 7.18             | Diabetes                          | Azec, Metrogyl, Vizyla                                                                                        |

|                  |    |   |    |    |     |    |   |   |      |                                 |                                                                                                            |
|------------------|----|---|----|----|-----|----|---|---|------|---------------------------------|------------------------------------------------------------------------------------------------------------|
| U24              | 57 | M | 28 | 26 | 27  | 5  | - | - | -    | Diabetes, Hypertension, Stroke  | Augmentin, sinarest, calpol, MVBC, Deplatt A, Zeryl, Atorva, Glimy M2, Felicita OD, Pan 40                 |
| <sup>b</sup> U25 | 27 | M | 20 | 23 | 19  | 11 | - | + | 7.37 | None                            | PCM, Cough syrup, Pantaprazole                                                                             |
| S10              | 46 | M | -  | -  | 32  | 0  | - | - | -    | Hypertension, Heart disease     | Azec 500 mg, Pan 40, MVBC, PCM 500 mg, Vit C, Vit A                                                        |
|                  |    |   |    |    | Neg | 7  | + | + | 4.23 |                                 |                                                                                                            |
| S11              | 58 | M | -  | -  | 21  | 0  | - | - | 3.98 | Diabetes mellitus               | PCM 500, Pan 40, Azee 500, MVBC                                                                            |
|                  |    |   |    |    | NA  | 7  | + | + | 9.69 |                                 |                                                                                                            |
| S20              | 74 | M | -  | -  | 26  | 0  | - | - | -    | Diabetes, Hypertension          | Pan, Vit C, Azec, MVBC                                                                                     |
|                  |    |   |    |    | Neg | 7  | - | - | 7.2  |                                 |                                                                                                            |
| S21              | 42 | M | -  | -  | NA  | 0  | - | - | -    | None                            | Azec, PCM, Pan, ondem, MVBC, Vit C, Zinc                                                                   |
|                  |    |   |    |    | NA  | 7  | + | + | 6.37 |                                 |                                                                                                            |
| S23              | 47 | M | -  | -  | 28  | 0  | - | - | 4.02 | Diabetes, Dyslipidemia          | Azithromycin, Tamiflu, for diabetes: Rozavel, Zita plus, Glimisave                                         |
|                  |    |   |    |    | NA  | 7  | - | + | 9.19 |                                 |                                                                                                            |
| S24              | 53 | M | -  | -  | 24  | 0  | - | - | -    | None                            | Azec 500, paracetamol 500, Pau 40, Ewseb 4mg, MUBC, Vit C, Zinc, cough syrup                               |
|                  |    |   |    |    | 33  | 7  | - | - | 3.26 |                                 |                                                                                                            |
| S25              | 46 | M | -  | -  | 24  | 0  | + | + | 3.92 | None                            | Azec, PCM, Emset, MVBC, vit C, zinc                                                                        |
|                  |    |   |    |    | NA  | 7  | + | + | 8.03 |                                 |                                                                                                            |
| S26              | 18 | M | -  | -  | 33  | 0  | - | - | -    | None                            | NA                                                                                                         |
|                  |    |   |    |    | Neg | 7  | - | + | 1.74 |                                 |                                                                                                            |
| S27              | 36 | M | -  | -  | 37  | 0  | + | + | 7.79 | Depression                      | NA                                                                                                         |
|                  |    |   |    |    | Neg | 7  | - | + | 7.64 |                                 |                                                                                                            |
| S29              | 33 | M | -  | -  | 25  | 0  | - | - | 3.42 | None                            | NA                                                                                                         |
|                  |    |   |    |    | Neg | 7  | - | - | 5.18 |                                 |                                                                                                            |
| S30              | 49 | F | -  | -  | NA  | 0  | - | - | -    | Hypertension, Hypothyroidism    | Azee 500, Pan40, MVBC, PCM 500, Thyronorm 100ug, continue antihypertensive, Cough syrup, HCQ, Vit C, Vit A |
|                  |    |   |    |    | NA  | 7  | - | + | 6.15 |                                 |                                                                                                            |
| S122             | 71 | M | -  | -  | 32  | 0  | - | - | NA   | None                            | NA                                                                                                         |
|                  |    |   |    |    |     | 7  | - | + | NA   |                                 |                                                                                                            |
| S123             | 48 | M | -  | -  | 32  | 0  | - | - | NA   | None                            | NA                                                                                                         |
|                  |    |   |    |    |     | 7  | - | + | NA   |                                 |                                                                                                            |
| S125             | 66 | F | -  | -  | 28  | 0  | - | - | NA   | None                            | NA                                                                                                         |
|                  |    |   |    |    |     | 7  | - | + | NA   |                                 |                                                                                                            |
| S132             | 49 | M | -  | -  | 30  | 0  | + | + | NA   | None                            | NA                                                                                                         |
|                  |    |   |    |    |     | 7  | + | + | NA   |                                 |                                                                                                            |
| S133             | 64 | M | -  | -  | 24  | 0  | - | - | NA   | Diabetes, Hypertension, Asthama | NA                                                                                                         |

|      |    |   |    |    |    |   |    |    |    |                         |                                                        |
|------|----|---|----|----|----|---|----|----|----|-------------------------|--------------------------------------------------------|
|      |    |   |    |    |    | 7 | -  | +  | NA |                         |                                                        |
| S171 | 37 | F | -  | -  | 29 | 0 | -  | +  | NA | None                    | NA                                                     |
|      |    |   |    |    |    | 7 | +  | +  | NA |                         |                                                        |
| S172 | 47 | F | -  | -  | 38 | 0 | +  | +  | NA | Thyroid                 | NA                                                     |
|      |    |   |    |    |    | 7 | +  | +  | NA |                         |                                                        |
| S173 | 37 | M | -  | -  | 29 | 0 | -  | -  | NA | None                    | NA                                                     |
|      |    |   |    |    |    | 7 | +  | +  | NA |                         |                                                        |
| S174 | 49 | M | -  | -  | 24 | 0 | -  | +  | NA | None                    | NA                                                     |
|      |    |   |    |    |    | 7 | -  | +  | NA |                         |                                                        |
| S175 | 77 | M | -  | -  | 24 | 0 | -  | +  | NA | Hypertension            | NA                                                     |
|      |    |   |    |    |    | 7 | +  | +  | NA |                         |                                                        |
| S177 | 65 | M | -  | -  | 30 | 0 | +  | +  | NA | Diabetes,Hypertension   | Mezopenum 1g, Pan<br>40mg, MPS 500mg,<br>Clexane 0.4cc |
|      |    |   |    |    |    | 7 | +  | +  | NA |                         |                                                        |
| S178 | 55 | M | 22 | 24 | -  | 0 | NA | NA | NA | None                    | NA                                                     |
|      |    |   |    |    |    | 7 | NA | NA | NA |                         |                                                        |
| S179 | 42 | M | 38 | 38 | -  | 0 | -  | -  | NA | None                    | NA                                                     |
|      |    |   |    |    |    | 7 | +  | +  | NA |                         |                                                        |
| S183 | 28 | M | 32 | 34 | -  | 0 | -  | -  | NA | None                    | NA                                                     |
|      |    |   |    |    |    | 7 | -  | +  | NA |                         |                                                        |
| S185 | 75 | F | 34 | 34 | -  | 0 | +  | +  | NA | None                    | NA                                                     |
|      |    |   |    |    |    | 7 | +  | +  | NA |                         |                                                        |
| S187 | 57 | F | 38 | 38 | -  | 0 | -  | -  | NA | None                    | NA                                                     |
|      |    |   |    |    |    | 7 | +  | -  | NA |                         |                                                        |
| S189 | 39 | M | 37 | 37 | -  | 0 | -  | -  | NA | Hypertension            | NA                                                     |
|      |    |   |    |    |    | 7 | -  | -  | NA |                         |                                                        |
| S192 | 57 | M | -  | 39 | -  | 0 | -  | -  | NA | None                    | NA                                                     |
|      |    |   |    |    |    | 7 | -  | +  | NA |                         |                                                        |
| S193 | 47 | M | 33 | 33 | -  | 0 | +  | +  | NA | None                    | NA                                                     |
|      |    |   |    |    |    | 7 | +  | +  | NA |                         |                                                        |
| S195 | 56 | M | 25 | 24 | -  | 0 | -  | -  | NA | Diabetes, Heart disease | NA                                                     |
|      |    |   |    |    |    | 7 | -  | +  | NA |                         |                                                        |
| S196 | 61 | F | 18 | 18 | -  | 0 | -  | -  | NA | Diabetes,Hypertension   | NA                                                     |
|      |    |   |    |    |    | 7 | -  | -  | NA |                         |                                                        |
| S197 | 32 | F | 37 | -  | -  | 0 | -  | -  | NA | None                    | NA                                                     |
|      |    |   |    |    |    | 7 | -  | -  | NA |                         |                                                        |
| S198 | 40 | M | 38 | 37 | -  | 0 | +  | -  | NA | None                    | NA                                                     |
|      |    |   |    |    |    | 7 | +  | -  | NA |                         |                                                        |
| S199 | 30 | M | 32 | 34 | -  | 0 | -  | +  | NA | None                    | NA                                                     |
|      |    |   |    |    |    | 7 | -  | +  | NA |                         |                                                        |

|     |    |   |    |    |    |    |   |   |              |                                          |                   |
|-----|----|---|----|----|----|----|---|---|--------------|------------------------------------------|-------------------|
| C26 | 49 | M | -  | 35 | -  | 32 | - | + | Plasma<br>NA | None                                     | NA                |
| C28 | 45 | M | -  | 34 | -  | 35 | - | + | Plasma<br>NA | Diabetes, Hypertension, Heart<br>disease | NA                |
| C29 | 37 | M | -  | 29 | -  | 40 | - | + | Plasma<br>NA | None                                     | NA                |
| C30 | 27 | M | -  | 36 | -  | 35 | - | + | 2.6          | None                                     | NA                |
| C31 | 37 | M | -  | 37 | -  | 30 | - | + | 7.78         | COPD, Diabetes                           | NA                |
| C32 | 20 | F | -  | -  | -  | 19 | - | + | 4.15         | NA                                       | NA                |
| C33 | 55 | M | -  | -  | -  | 19 | - | + | 4.75         | NA                                       | NA                |
| C42 | 22 | M | -  | -  | -  | 33 | - | - | -            | NA                                       | NA                |
| C43 | 22 | M | -  | 25 | -  | 39 | - | + | 3.75         | NA                                       | NA                |
| C44 | 42 | M |    |    |    | NA | - | + | 4.48         | NA                                       | NA                |
| C45 | 22 | M | -  | 24 | 26 | 37 | - | + | 2.63         | NA                                       | NA                |
| C46 | 40 | M | -  | +  | -  | 31 | + | + | 5.31         | NA                                       | NA                |
| C47 | 20 | M | -  | 27 | -  | 41 | - | + | 4.89         | NA                                       | NA                |
| C48 | 34 | M |    |    |    | NA | - | - | -            | NA                                       | NA                |
| C49 | 49 | M | +  | +  | -  | 60 | - | - | -            | NA                                       | NA                |
| C50 | 25 | F | -  | 37 | -  | 62 | - | + | 2.92         | NA                                       | NA                |
| C51 | 35 | M | -  | -  | 28 | 57 | - | + | 6.57         | NA                                       | NA                |
| C52 | 24 | M | -  | -  | -  | 48 | + | + | -            | NA                                       | NA                |
| C53 | 52 | M | -  | 23 | -  | 38 | - | + | 2.58         | NA                                       | NA                |
| C54 | 24 | F | -  | 33 | -  | NA | - | + | -            | NA                                       | NA                |
| C55 | 34 | M | NA | NA | NA | 36 | - | + | -            | NA                                       | NA                |
| C56 | 34 | M | -  | 30 | -  | 40 | - | + | 9.47         | NA                                       | NA                |
| C57 | 28 | F | NA | NA | NA | 52 | - | + | NA           | None                                     | None              |
| C58 | 33 | F | NA | NA | NA | 55 | - | + | NA           | None                                     | None              |
| H1  | 24 | M | N  | N  | N  | N  | - | - | N            | None                                     | None              |
| H2  | 39 | M | N  | N  | N  | N  | - | - | N            | None                                     | None              |
| H3  | 47 | M | N  | N  | N  | N  | - | - | N            | None                                     | None              |
| H4  | 45 | M | N  | N  | N  | N  | - | - | N            | None                                     | None              |
| H5  | 33 | F | N  | N  | N  | N  | - | - | N            | None                                     | None              |
| H6  | 25 | F | N  | N  | N  | N  | - | - | N            | None                                     | None              |
| H7  | 25 | M | N  | N  | N  | N  | - | - | N            | None                                     | None              |
| H8  | 29 | F | N  | N  | N  | N  | - | - | N            | None                                     | None              |
| H9  | 31 | F | N  | N  | N  | N  | - | - | N            | None                                     | None              |
| H10 | 25 | F | N  | N  | N  | N  | - | - | N            | Hypothyroidism                           | Thyronorm (88mcg) |
| H11 | 25 | M | N  | N  | N  | N  | - | - | N            | None                                     | None              |
| H12 | 29 | M | N  | N  | N  | N  | - | - | N            | None                                     | None              |
| H13 | 30 | F | N  | N  | N  | N  | - | - | N            | None                                     | None              |

|     |    |   |   |   |   |   |   |   |   |      |      |
|-----|----|---|---|---|---|---|---|---|---|------|------|
| H14 | 25 | F | N | N | N | N | - | - | N | None | None |
| H15 | 46 | F | N | N | N | N | - | - | N | None | None |
| H16 | 24 | M | N | N | N | N | - | - | N | None | None |
| H17 | 25 | M | N | N | N | N | - | - | N | None | None |
| H18 | 26 | M | N | N | N | N | - | - | N | None | None |
| H19 | 25 | M | N | N | N | N | - | - | N | None | None |

Footnote: U: 1st set of 25 in-patients: (U1 – U25); C: Convalescent plasma candidates (C26 – C58); S: In- patients recruited and followed up (Day 0 and Day 7, S10 – S199); NA – Not Available; N – Not Applicable; a, Asymptomatic individuals; b, Individuals transferred to other hospitals; c, Discharge information not available. All others were discharged after two consecutive negative PCR results or resolution of symptoms. Co-morbidities where documented are listed. Rapid Antibody test had 77% concordance with CLIA.

- 1 Supplemental Figure 1: Distribution of plasma TNF- $\alpha$  across various groups of SARS-CoV-2 infected individuals. Comparison of plasma levels of (A) in 3 healthy, seronegative controls, in-patients - IgG-/IgM- (n=22), IgG+/IgM+ (n=11), IgG+/IgM- (n=14) and sero-convalescent (n=22) groups. (B) at day 0 (n=11), day 7 (n=11), in convalescent (n=22) and in healthy (n=3) group. (C) Change in plasma levels on follow up (n=11) between day 0 and day 7. (D) Differences in plasma levels between male (n=18) and female (n=7). Red coloured symbols indicate asymptomatic individuals. Pink coloured symbols indicate IgG-/IgM- individuals in sero-convalescent group. Statistical significance was calculated by Wilcoxon matched-pairs signed rank test and unpaired Mann-Whitney U-test; \*,  $p < 0.05$ ; \*\*,  $p < 0.01$ ; and \*\*\*,  $p < 0.001$

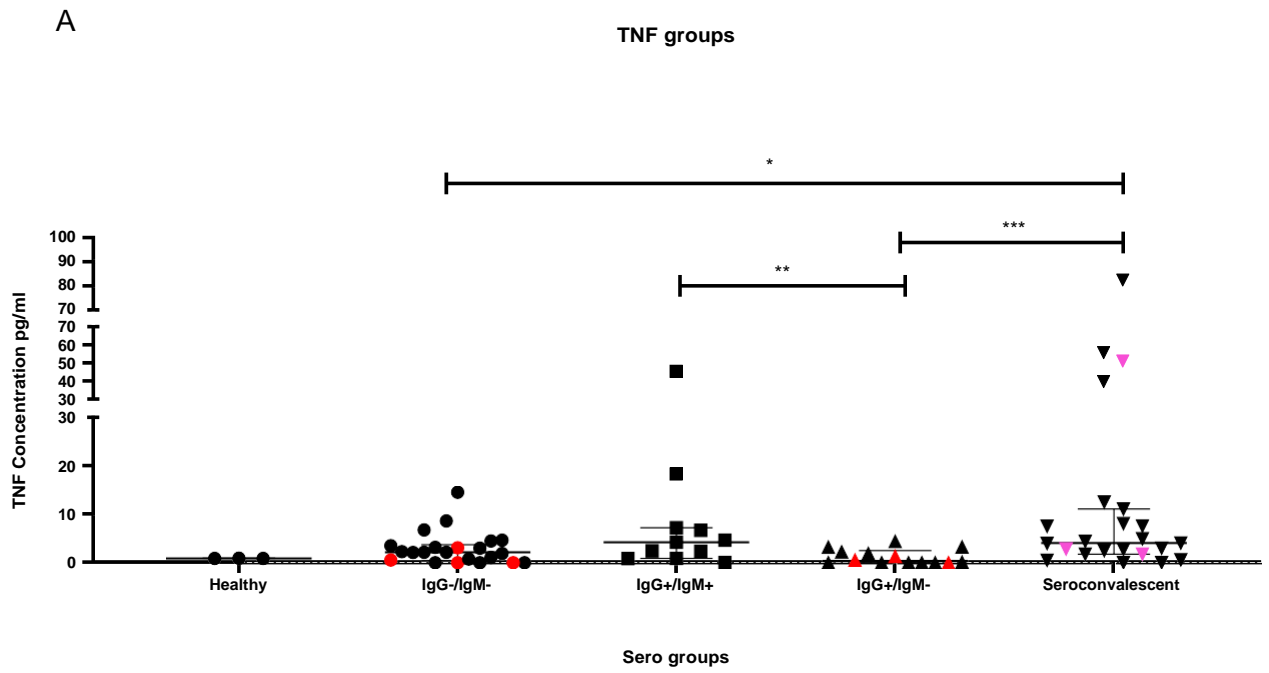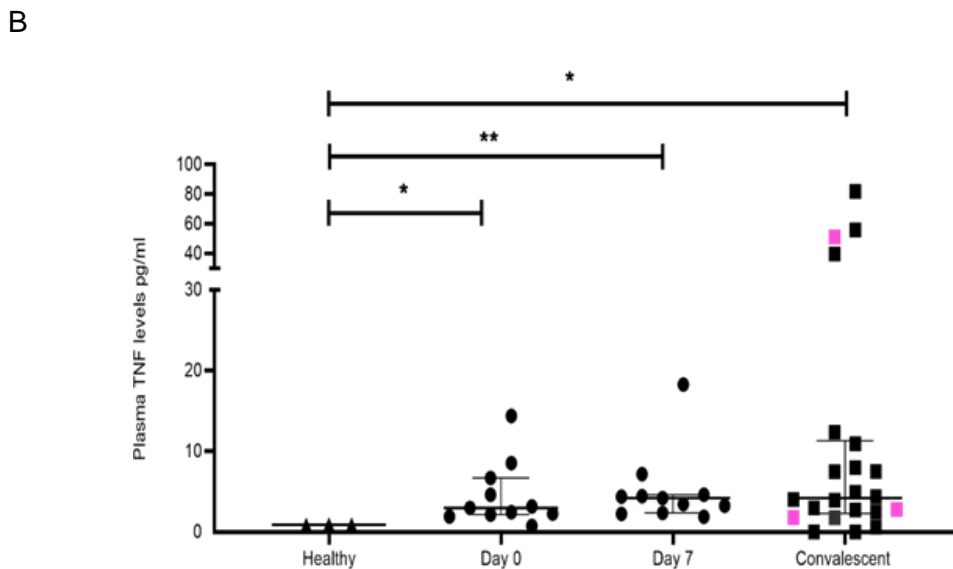

C

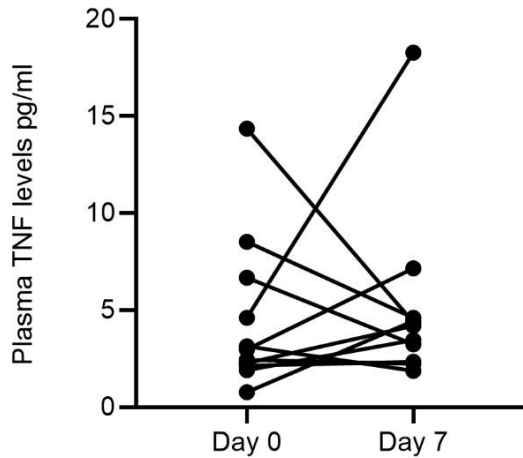

D

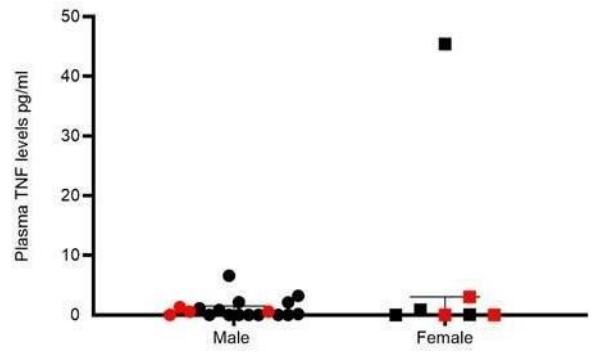

Supplemental Figure 2: Association of IL-6 with other cytokines and Ct for RT-PCR of different SARS-CoV-2 gene. Association of plasma IL-6 levels with cytokines (n=69) (A) IL-2, (B) IL-4, (C) IL-10, (D) IFN $\gamma$ , (E) TNF- $\alpha$ , and (F) IL-17A as well as with Ct values for viral gene targets (G) N (n=23); (H) O (n=36) and (I) S (n=50) as evaluated by real time PCR. Undetectable levels of cytokines have been assigned values of 0.

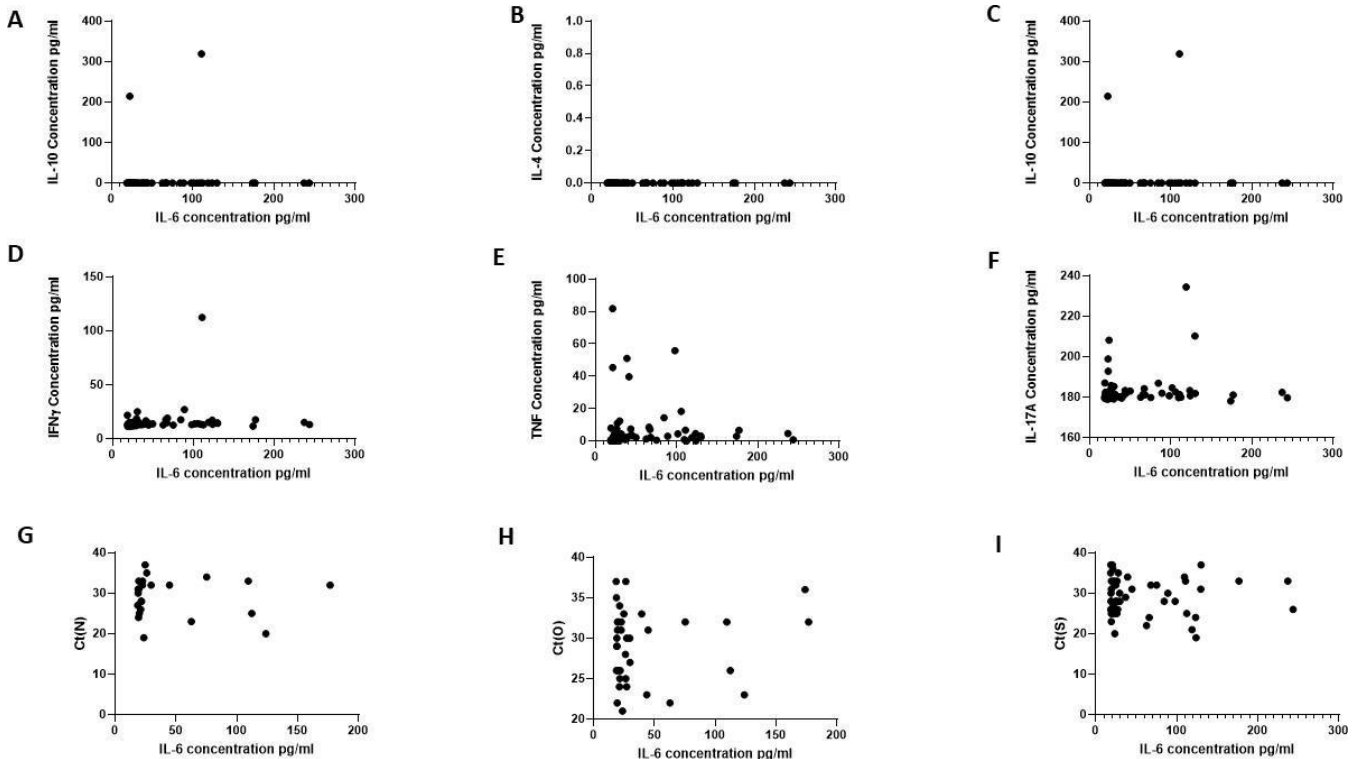



Supplemental Figure 3: Association of TNF- $\alpha$  with other cytokines and Ct for RT-PCR of different SARS-CoV-2 gene. Association of plasma TNF- $\alpha$  levels with cytokines (n=69) (A) IL-2, (B) IL-4, (C) IL-10, (D) IFN $\gamma$  and (E) IL-17A as well as with Ct values for viral gene targets (F) N (n=23); (G) O (n=36) and (H) S (n=50) as evaluated by real time PCR. Undetectable levels of cytokines have been assigned values of 0.

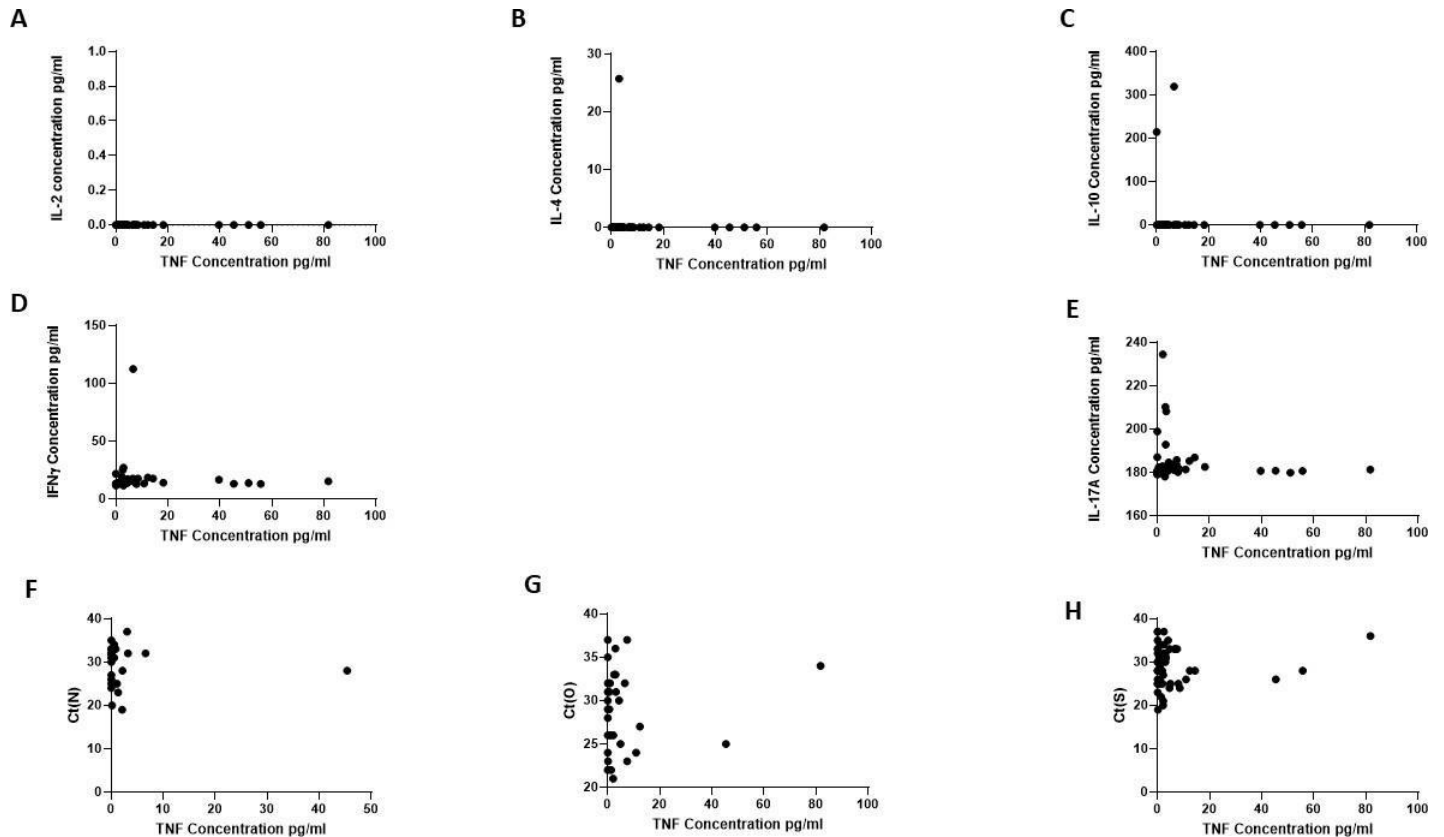

Supplemental Figure 4: Analysis of circulating lipopolysaccharides (LPS) with SARS- CoV-2 disease progression A. Comparison of LPS between IgG-/IgM- (n=10), IgG+/IgM+ (n=5), IgG+/IgM- (n=10) and convalescent (n=4) groups. B. Variation in LPS among in- patients (n=25) and in convalescent (n=4) C. Differences in LPS between male (n=21) and female (n=8). D-E. Association of circulating LPS with (D) IL-6 and (E) sMAdCAM (n=29). Red coloured symbols represent asymptomatic individuals. Statistical analysis was performed using Graphpad Prism 8.0 Mann-Whitney U-test was used to compare unpaired groups. Correlation analysis was performed using non parametric Spearman Rank Correlation test. Significance was considered at  $p < 0.05$ .

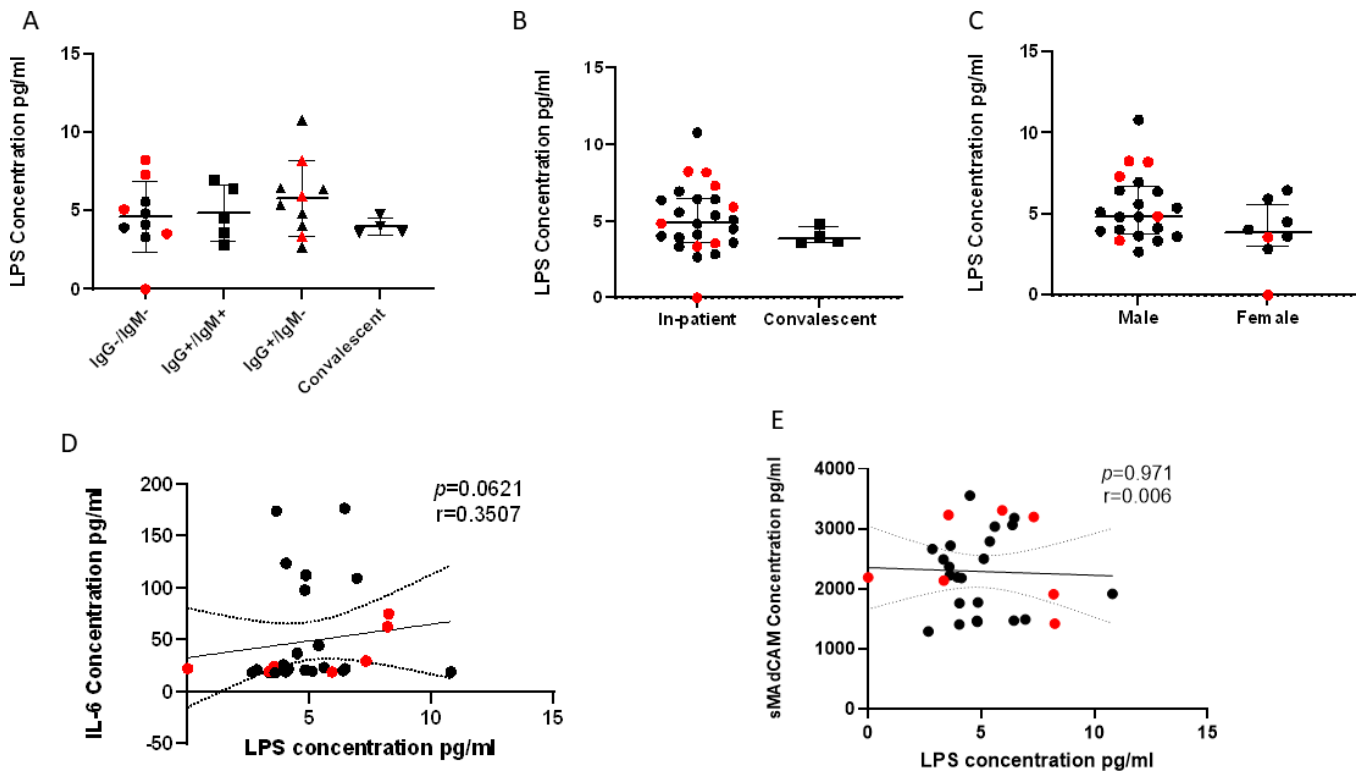

Supplement: DataSheet_1.pdf [file DataSheet_1.pdf]
